# Supplementary material for: Learning Symbolic Expressions: Mixed-Integer Formulations, Cuts, and Heuristics
Source: Atypon-hosted journal article supplement (doi:10.1287/ijoc.2022.0050), 2023-07-19
Supplement: 2022.0050-master.cd.zip [file online_supplement.pdf › 2022.0050-master/docs/online_supplement.pdf]

# Online Supplement: Learning Symbolic Expressions: Mixed-Integer Formulations, Cuts, and Heuristics

Jongeun Kim, Sven Leyffer, Prasanna Balaprakash

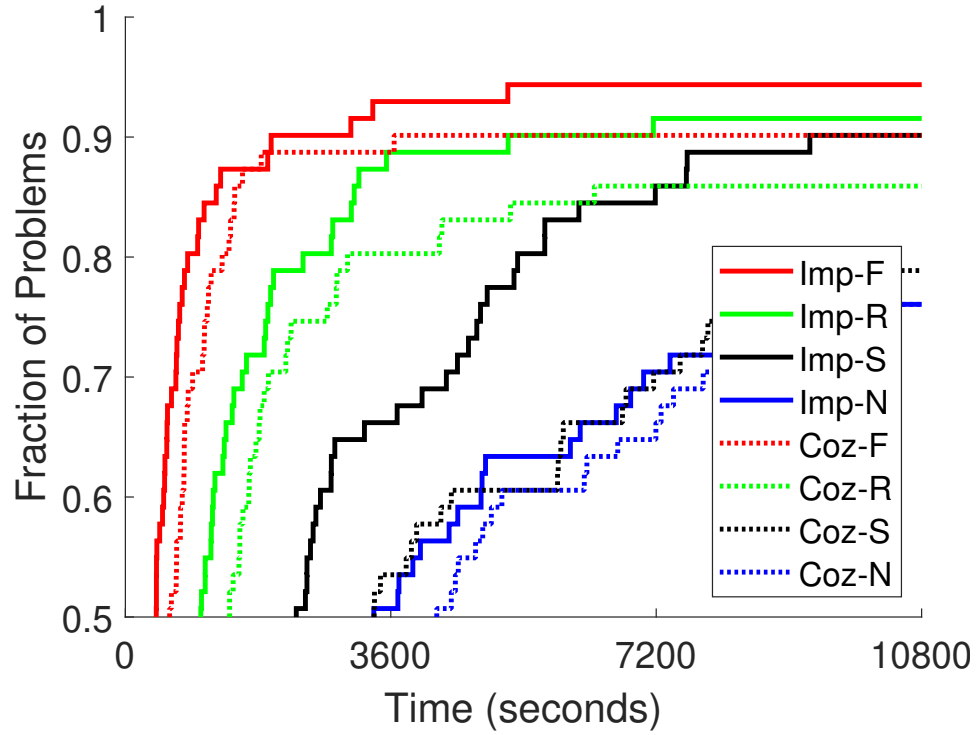

Figure 7(b). Comparison of solution times of MINLP solves with the improved formulations and those of [Cozad and Sahinidis \(2018\)](#) - All.

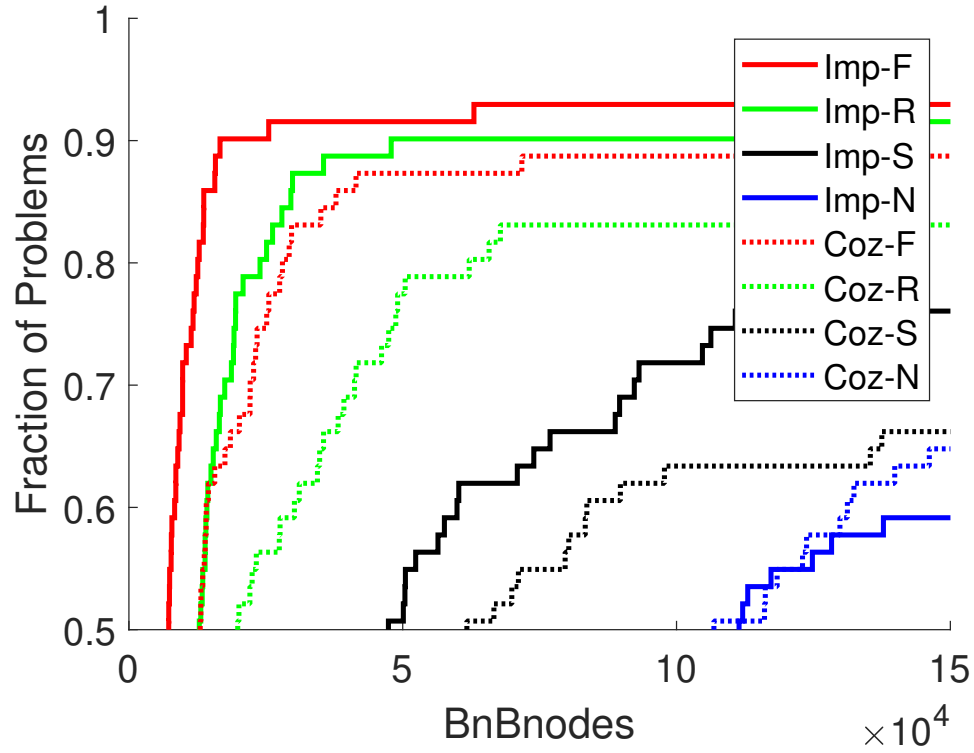

Figure 8. Comparison of the number of nodes in the branch-and-bound tree of MINLP solves with the improved formulations and the formulations of Cozad and Sahinidis (2018).

## References

- A. Cozad and N. V. Sahinidis. A global MINLP approach to symbolic regression. *Mathematical Programming*, 170(1):97–119, 2018. doi: 10.1007/s10107-018-1289-x.
